# Supplementary material for: Ionospheric Total Electron Content responses to HILDCAAs intervals
Source: Copernicus journal article supplement (doi:10.5194/angeo-2019-105), 2019-08-07
Supplement: Supplementary file [file angeo-2019-105-AC2-supplement.pdf]

1 **Ionospheric Total Electron Content responses to HILDCAAs intervals**

2 R. P. Silva<sup>\*1,2</sup>, C. M. Denardini<sup>1</sup>, M. S. Marques<sup>3</sup>, L. C. A. Resende<sup>1,4</sup>, J. Moro<sup>4,5</sup>, G.  
3 A. S. Picanço<sup>1</sup>, G. L. Borba<sup>3</sup>, M. A. F. Santos<sup>2</sup>.

4

5

6 <sup>1</sup>National Institute for Space Research – INPE, São José dos Campos-SP, Brazil.

7 <sup>2</sup>Northeast Regional Center – CRN/INPE, Natal-RN, Brazil.

8 <sup>3</sup>Geophysics Department (DGEF), Federal University of Rio Grande do Norte  
9 (UFRN), Natal-RN, Brazil.

10 <sup>4</sup>National Space Science Center, China Academy of Science, CAS, Beijing, China;

11 <sup>5</sup>Southern Regional Space Research Center – CRS/COCRE/INPE, Santa Maria-RS,  
12 Brazil.

13

14

15

16 \*Corresponding author: INPE/DIDAE, Av. dos Astronautas, 1758, Jd. da Granja,

17 12227-010, São José dos Campos, SP, Brazil; Tel.: +55 12 3208-7184; e-mail:

18 [regia.pereira@inpe.br](mailto:regia.pereira@inpe.br); [regiapereira@gmail.com](mailto:regiapereira@gmail.com)

19

20

21

22 **Abstract**

23 The High-Intensity Long-Duration and Continuous AE Activities (HILDCAA)  
24 intervals are capable of causing a global disturbance in the terrestrial ionosphere.  
25 However, the ionospheric storms' behavior due to these ~~intervals geomagnetic~~  
26 ~~activity-forms~~ is still not widely understood. In ~~the current this~~ study, we seek to  
27 comprise the HILDCAAs disturbance time effects in the Total Electron Content  
28 (TEC) values with respect to the quiet days' pattern analyzing local time and seasonal  
29 dependences, and the influences of the solar wind velocity to a sample of ten intervals  
30 occurred in 2015 and 2016 years. The main results showed that the hourly distribution  
31 of the disturbance TEC may vary substantially between one ~~HILDCAA~~ interval and  
32 another. ~~Doing a comparative to geomagnetic storms, while the positive ionospheric~~  
33 ~~storms are more pronounced in the winter, this season presents less geoeffectiveness~~  
34 ~~or almost none to HILDCAA intervals.~~ It was find an equinoctial anomaly, since the  
35 equinoxes represent more ionospheric TEC responses ~~during HILDCAA intervals~~  
36 than the solstices. Regarding to the solar wind velocities, although HILDCAA  
37 intervals are associated to High Speed Streams, this association does not present a  
38 direct relation ~~regards~~ to TEC disturbances ~~magnitudes~~ in low and equatorial  
39 latitudes.

40

41

42

43

44

45 *Keywords:* HILDCAA, TEC, Equatorial Ionosphere

46

## 47 **1. Introduction**

48 As similar to geomagnetic storms, High-Intensity Long-Duration and Continuous AE  
49 Activities (HILDCAA) intervals can influence the ionosphere, leading to disturbances  
50 in the ionospheric F2-region. It is well known that these intervals can change the F2-  
51 region peak height being, generally, less intense than those observed during typical  
52 geomagnetic storm events (Sobral et al., 2006; Koga et al., 2011, Silva et al., 2017).

53 In fact, HILDCAAs are characterized by present some criteria: i) the AE index must  
54 reach an intensity peak greater than or equal to 1000 nT; ii) ~~the~~ ~~The~~ AE index needs  
55 to be almost continuous and never drops below 200 nT for more than two hours at a  
56 time; iii) ~~the~~ ~~The~~ event must have a duration of at least two days, and iv) ~~the~~ ~~The~~  
57 event occurred after the main phase of magnetic storms. However, the same physical  
58 process may occur whether one of the four criteria are not strictly followed (Tsurutani  
59 and Gonzalez, 1987; Tsurutani et al., 2004; Sobral et al., 2006, Tsurutani et al., 2006;  
60 Hajra et al., 2013, Silva et al., 2017). As the main feature is the high AE index levels,  
61 in this study we have considered drops below 200 nT for more than two hours as long  
62 as the AE index value returns in high activity for prolonged hours.

63 The electron density perturbation in the ionosphere during HILDCAA events is  
64 different from that one occurred during geomagnetic storms in the equatorial and low  
65 latitudes stations. Since the HILDCAA presents a weak/moderate geoeffectiveness  
66 when it compares to the other forms of space disturbances, it is expected that the  
67 ionosphere response presents a ~~different~~ ~~differential~~ behavior.

68 The Total Electron Content (TEC) is an important ionospheric parameter to several  
69 studies and technologic applications. As HILDCAAs can cause F2-region peak  
70 alterations, it can be observed the enhancements/depletions in TEC profile. In fact,  
71 the TEC response to the geomagnetic storms is a well-known issue in the space

72 physics field (Lu et al., 2001; Kutiev et al., 2005; Mendillo, 2006; Maruyama and  
73 Nakamura, 2007; Biqiang et al., 2007; ~~de Siqueira et al., 2011~~). However, only few  
74 studies about TEC pattern during HILDCAAs intervals have been found in the  
75 literature (de Siqueira et al., 2011).

76 Ionospheric storms are manifestations of space weather events, which are caused by  
77 energy inputs in the upper atmosphere in the form of enhanced electric fields,  
78 currents, and energetic particle precipitation (Buonsanto, 1999; Mendillo, 2006).  
79 Usually, ionospheric storms are associated with ionosphere responses to geomagnetic  
80 storm events. However, in a broader way, these responses happen due to  
81 magnetospheric energy inputs to the Earth's upper atmosphere, and this can occur to  
82 all kind of geomagnetic activity form. Park (1974) pointed that ionospheric storms  
83 can be understood in terms of the superposed effects of many substorm. In view of  
84 the foregoing and considering that the development of ionospheric storms during  
85 HILDCAAs intervals has not been dealt with in depth, in the current study we have  
86 focused the TEC pattern during this kind of event.

87 Recently, Verkhoglyadova et al. (2013) suggested that HILDCAAs associated with  
88 High Speed Streams (HSS) can be one of the external driving TEC variabilities.  
89 Indeed, the continuous energy injection and energetic particles precipitation into the  
90 polar upper atmosphere during HILDCAA intervals could modify the dynamic and  
91 chemical coupling process of the thermosphere-ionosphere system resulting in  
92 changes in the electron density. These modifications, beyond to change the auroral  
93 electron density, can be mapped to low latitudes involving electric fields  
94 disturbances, as prompt penetration electric fields (PPEF) and disturbance dynamo  
95 (DD) (Koga et al., 2011; Silva et al., 2017; Yeeram and Paratrasri, 2019).

96 Therefore, in the current study we have focused the TEC pattern during HILDCAAs  
97 intervals, **taking into account** ~~taking account~~ local time dependence, seasonal  
98 dependence and high/slow speed streams influences in the equatorial and low latitude  
99 ionosphere. This paper is structured as followed: in the next section we present the  
100 HILDCAA intervals chosen to support this study as well as the GNSS receivers  
101 locations over the Brazilian region. In section 3 we show the results and discussion of  
102 the analysis and the conclusions are presented in the last section.

103

## 104 **2. Data and Methodology**

105 In this study was possible to construct an overall perception of the ionospheric storms  
106 occurred during HILDCAA disturbance time intervals that affect the TEC values with  
107 respect to the expected behavior for quiet days. The features studied are local time  
108 and seasonal dependences, and solar wind velocity influences.

109 We have selected ten HILDCAA intervals occurred during the 2015 – 2016 period.  
110 These intervals are listed in Table 1, where the two columns present the identification  
111 and the data range of each interval. The geomagnetic indices and interplanetary data  
112 used to classify the HILDCAA events were obtained from OMNIWeb **Plus data and**  
113 **service** (<https://omniweb.gsfc.nasa.gov/ow.html>). The Kp index data were obtained  
114 from the World Data Center for Geomagnetism, Kyoto, Japan ([http://wdc.kugi.kyoto-](http://wdc.kugi.kyoto-u.ac.jp/kp/index.html)  
115 [u.ac.jp/kp/index.html](http://wdc.kugi.kyoto-u.ac.jp/kp/index.html)). In this work it was used the daily Kp sum value.

116 The TEC mean was initially processed by a program developed at the Institute for  
117 Space Research, Boston College, USA (Krishna, 2017). The mean values of vertical  
118 TEC (VTEC) were obtained from two Brazilian GNSS stations, São Luís (SL) (2.59  
119 S; 44.21 W) and Cachoeira Paulista (CP) (22.68 S; 44.98 W), representing the  
120 station closest to the equator and the low latitude station, respectively. The Rinex files

121 used in this study were obtained from Brazilian Network for Continuous Monitoring  
122 of the GNSS-RBMC Systems (RBMC)  
123 ([https://www.ibge.gov.br/en/geosciences/geodetic-positioning/geodetic-](https://www.ibge.gov.br/en/geosciences/geodetic-positioning/geodetic-networks/20079-brazilian-network-for-continuous-monitoring-of-the-gnss-systems-2?=&t=oque-e)  
124 [networks/20079-brazilian-network-for-continuous-monitoring-of-the-gnss-systems-](https://www.ibge.gov.br/en/geosciences/geodetic-positioning/geodetic-networks/20079-brazilian-network-for-continuous-monitoring-of-the-gnss-systems-2?=&t=oque-e)  
125 [2?=&t=oque-e](https://www.ibge.gov.br/en/geosciences/geodetic-positioning/geodetic-networks/20079-brazilian-network-for-continuous-monitoring-of-the-gnss-systems-2?=&t=oque-e)). Besides that, the TEC data during HILDCAA events were analyzed  
126 and then compared with a set of three days average belonging to a quiet period, in  
127 which it refers to the three days less disturbed ( $\Sigma K_p < 24$ ) of the month of the  
128 occurrence of each HILDCAA interval.

129 Figure 1 shows a map with the location of each GNSS station, which is represented  
130 by a red triangle. The dashed line represents the magnetic equator. The TEC data  
131 obtained during the HILDCAA intervals were analyzed and then compared to the  
132 TEC data during the selected quiet days, resulting in dTEC (dTEC = TEC mean –  
133 TEC quiet days). All the analyses done in this work took into account the dTEC  
134 values.

135

### 136 **3. Results and Discussions**

137 In this section, we will present the ionospheric TEC responses observed during ten  
138 HILDCAA intervals focusing on local time dependence and seasonal features and the  
139 solar wind velocity influences.

140

#### 141 **3.1 Local time dependence**

142 A common feature of ionospheric storms is to be associated with dependence on local  
143 time, mainly when they are caused by geomagnetic storms (Titheridge and  
144 Buonsanto, 1988; Pedatella et al., 2010). However, to the best of the authors'

145 knowledge, no study has been found analyzing this aspect when regarding HILDCAA  
146 intervals.

147 Figures 2 and 3 show the mean dTEC hourly values related to all HILDCAA intervals  
148 for São Luís and Cachoeira Paulista, respectively. Each panel represents a single  
149 interval from the bottom (H01) to the top (H10). The x axis is given in the Universal  
150 Time (LT = UT – 3) and the color scale represents the dTEC values in TEC units  
151 (TECu).

152 Notice that the dTEC values have a greater magnitude for the low latitude GNSS  
153 station to the detriment of the closer equatorial GNSS station. The minimum and  
154 maximum values are, respectively, -16.00 TECu and 27.40 TECu for ~~to~~ São Luís, and  
155 -37.60 TECu and 48.80 TECu for ~~to~~ Cachoeira Paulista. These values were  
156 considered to perform the TEC hourly distribution, i. e., for each specific GNSS  
157 station, the maximum and minimum TEC values were used to analyze all HILDCAAs  
158 in the same range. ~~It was considered the same minimum and maximum values~~  
159 ~~occurred to all intervals, for each station.~~ This fact explains why some intervals  
160 appear too close to the quiet time pattern. We believed that since the HILDCAA  
161 events has low/moderate geoeffectiveness it was not expected high values of the  
162 dTEC.

163 The distribution of the dTEC effects hour-to-hour during HILDCAA intervals shows  
164 a substantial variability from one event to another. Habarulema et al. (2013) found  
165 that the negative storms effects are observed during geomagnetic storms recovery  
166 phases ~~that~~ over equatorial latitudes. However, since HILDCAAs intervals are  
167 characterized by a long continuous phase of Dst index recovery, this does not apply.  
168 The HILDCAA intervals present the positive dTEC predominance. 60% (70%) of all  
169 intervals present a positive dTEC response during the whole event for São Luís

170 (Cachoeira Paulista). In a more simplified definition, HILDCAA means an interval  
171 where there is always energy injection (Søraas et al., 2004; Sandanger et al., 2005).  
172 Silva et al. (2017) observed that during HILDCAA intervals it was seen the uplift of  
173 the equatorial F2 region peak height, probably due to prompt penetration electric  
174 fields. One of the main mechanisms of TEC enhancements is the rise of the  
175 ionosphere to higher altitudes where the recombination rates are small. Besides that,  
176 our results are in agreement with the results found by de Siqueira et al. (2017). They  
177 did a study comparing the TEC responses between two magnetic storms and two  
178 HILDCAAs intervals following by them, and found a great TEC variability pattern  
179 from one to another event. Hereupon, it was not possible to find a response pattern to  
180 the HILDCAA effects in the equatorial and low latitude TEC considering only the  
181 local time. There is great variability, and it is important to consider the day-to-day  
182 ionospheric variabilities as well as the separate effect of each electric fields  
183 disturbance (PPEF/DD).

184 Comparing both stations, Cachoeira Paulista GNSS station presented higher values  
185 both to positive as negative ionospheric storms. During the daytime hours, the latitude  
186 is responsible for the different ionospheric responses due to the presence of  
187 photoionization. This probably explains the dTEC higher sensibility to low latitude  
188 station in detriment of the closer equatorial latitude station.

189 Analyzing the hourly behavior of each interval from Figures 2 and 3, we observed  
190 more intensity in TEC disturbances, both for positive and negative storms, during  
191 some specific intervals. This aspect led us to make a seasonal analysis, which will be  
192 presented in the next section.

193

194 3.2 Seasonal Dependence



195 It is well known for geomagnetic storms that the influence of the season entails on  
196 positive/negative ionospheric storms is more pronounced in winter/summer than in  
197 equinox months (Matsushita, 1959; Prölss and Najita, 1975; Mendillo, 2006, among  
198 others). However, has not yet been established whether the occurrence of HILDCAA  
199 interval in different seasons can do different TEC disturbances.

200 In a recent study involving more than one hundred HILDCAA events, Hajra et al.  
201 (2013) reported no seasonal dependence, in what regards to predominant occurrence  
202 rate in any specific epoch of the year due to the solar cycle influences. They  
203 announced the HILDCAAs may occur during any month and any year, with increases  
204 in the numbers of events occurring during the solar cycle descending phase. In the  
205 current study, it was considered as seasonal dependence feature the TEC disturbances  
206 responses at HILDCAA intervals already classified in a seasonal way. The years  
207 2015 and 2016 years comprise the descending phase of the 24<sup>th</sup> solar cycle, which  
208 made it possible to catalog an expressive number of HILDCAAs events in a short  
209 time. Among the ten intervals chosen for this study, we have separated eight ones to  
210 represent the seasonal variability, being two events for each **season station**, taking  
211 into account the month of occurrence of each interval, and considering the seasons as  
212 they occur in South Hemisphere. The intervals are distributed according to the Table  
213 2.

214 Figure 4 shows the disturbed TEC according to the seasonal classification which the  
215 blue and coral colors refer to São Luís and Cachoeira Paulista, respectively. The solid  
216 lines show an estimate of the central tendency for all values, minute-to-minute, for all  
217 days of the events belongs to the season, while the shaded area represents the  
218 confidence interval for that estimate. While the positive storms are more pronounced  
219 in the winter for geomagnetic storms, to HILDCAA intervals this season presents less

220 geoeffectiveness, or almost none. Our results show that the equinoxes represent more  
221 ionospheric TEC responses during HILDCAA intervals than the solstices. Both  
222 equatorial and low latitude stations present positive storms during the autumn, while  
223 the spring presents a negative behavior, mainly. This equinoctial anomaly may be  
224 originated from the equinoctial differences in neutral winds, thermospheric  
225 composition, and electric fields. Additional studies are necessary to quantify how  
226 each factor can play an important role in HILDCAA seasonal TEC disturbances.

227

### 228 3.3 Solar wind velocities analysis

229 During the solar cycle descending phase, polar coronal holes migrate to lower  
230 latitudes emanating intense magnetic fields. When HSS from these low latitudinal  
231 coronal holes interact with slow speed streams (SSS) a region called Corotating  
232 Interaction Regions (CIR) is formed and it is well characterized by compressions of  
233 the magnetic field and plasma.

234 There are considerable works ~~that whose~~ show how HILDCAA is well associate with  
235 HSS and CIRs (Tsurutani et al., 2006; Verkhoglyadova et al., 2013). However, to be  
236 associated not necessarily means that the degree of geoeffectiveness is directly related  
237 to high speeds. [Including, Yeeram \(2019\) suggest that Alfvén waves present during](#)  
238 [HILDCAA interval are more dominant than CIR-storms, revealing that both are](#)  
239 [controlled by different interplanetary drivers.](#)

240 Figure 5 shows the solar wind velocities ( $V_{SW}$ ) during each HILDCAA interval. As  
241 the Figure 4, the blue and coral colors refer to São Luís and Cachoeira Paulista,  
242 respectively. The diameter of the bubble is related to the velocity. The results showed  
243 great variability from one interval to another, even considering the intervals that  
244 occurred in the same year. In our first analysis (not shown here) we did not find a

245 direct association or cross-correlation between the  $V_{sw}^{SW}$  magnitude and the dTEC  
246 in the equatorial and low latitude GNSS stations. Kim (2007) indicated that  
247 HILDCAA intervals can be accompanied by HSS as well as SSS. It is possible to see  
248 in our results that the dTEC responses to some intervals present similar behavior to  
249 both HSS and SSS (e.g. H03, H07 and H08). This means that HILDCAA intervals  
250 can affect the ionospheric TEC, but not in a direct correlation.

251

#### 252 **4. Conclusions**

253 For this work, the ionospheric TEC response to a sample of ten HILDCAA intervals  
254 has been studied. We have used two GNSS stations from RBMC network  
255 representing equatorial and low latitude locations. As HILDCAA can affect the  
256 equatorial ionospheric F2 region, some disturbed TEC from its quiet time pattern is  
257 found. Addressing how the ionospheric storms behave during the HILDCAA  
258 intervals is our main goal.

259 **In summary** **Summarizing**, HILDCAAs geoeffectiveness in Earth is mainly associated  
260 with CIRs, for this reason, the HILDCAA occurrence is more recurrent in the solar  
261 cycle descending phase since CIRs play a major role during this phase. Their effects  
262 occur during magnetic reconnection due to association with southward z component  
263 of the interplanetary magnetic field and Alfvén waves present in it (Tsurutani et al.,  
264 2004). These long-lasting intervals are due to continuous injection of energy and  
265 precipitation of particles, which disturb the high latitude ionosphere. The mainly  
266 disturbs are changes in thermospheric neutral composition, temperature, winds and  
267 electric fields. Similar to geomagnetic storms, these disturbs can be mapped to low  
268 and equatorial latitude and alter the quiet time ionosphere. However, generally, they  
269 are less intense because in one astronomical unit the CIRs are not fully developed. In

270 this study we seek to understand the behavior of the ionospheric storm during  
271 HILDCAA intervals. The main results are highlighted below:

- 272 • The hourly distribution of the dTEC during HILDCAAs intervals may vary  
273 substantially between low and equatorial latitude. Probably, the photoionization  
274 associated with latitude is responsible for these variations;
- 275 • Despite the geomagnetic storms recovery phase presents negative ionospheric  
276 storms, this pattern do not occur during HILDCAA intervals. There is great  
277 variability from one interval to another, but, predominantly, occurs positive phase;
- 278 • Regarding seasonal features, while the positive storms are more pronounced in the  
279 winter for geomagnetic storms, this season present less geoeffectiveness, or almost  
280 none to HILDCAA intervals. The equinoxes represent more ionospheric responses  
281 to HILDCAA intervals presenting positive/negative phase predominance during  
282 the autumn/spring;
- 283 • A well-known HILDCAA feature is its association with HSS present in the solar  
284 wind. However, this association does not present a direct relation regards to TEC  
285 disturbances in low and equatorial latitudes.

286 To conclude, the upshot of this study is the possibility to understand how ionospheric  
287 storms behave during some HILDCAA intervals and to contribute to improving the  
288 discussions about this issue.

289

290 **Acknowledgements**

291 R. P. Silva acknowledges the supports from Conselho Nacional de Desenvolvimento  
292 Científico e Tecnológico (CNPq) through the Grant No. 300329/2019-9. C. M.  
293 Denardini thanks to CNPq/MCTIC (Grant 303643/2017-0). L. C. A. Resende would  
294 like to thank the National Space Science Center (NSSC), Chinese Academy of  
295 Sciences (CAS) for supporting her postdoctoral. J. Moro would like to acknowledge  
296 the China-Brazil Joint Laboratory for Space Weather (CBJLSW), National Space  
297 Science Center (NSSC), Chinese Academy of Sciences (CAS) for supporting his  
298 Postdoctoral fellowship, and the National Council for Scientific and Technological  
299 Development (CNPq) for the grant 429517/2018-01. G. A. S. Picanço thanks CAPES  
300 for supporting his Ph.D. (Grant 88887.351778/2019-00). We also would like to thank  
301 the [OMNIWeb Plus data and service](#) ~~OMNI data~~  
302 (<https://omniweb.gsfc.nasa.gov/ow.html>), and the World Data Center for  
303 Geomagnetism, Kyoto (<http://wdc.kugi.kyoto-u.ac.jp/kp/index.html>). The Rinex files  
304 were obtained from Brazilian Network for Continuous Monitoring of the GNSS-  
305 RBMC Systems (RBMC) at interface  
306 [https://www.ibge.gov.br/en/geosciences/geodetic-positioning/geodetic-](https://www.ibge.gov.br/en/geosciences/geodetic-positioning/geodetic-networks/20079-brazilian-network-for-continuous-monitoring-of-the-gnss-systems-2?=&t=o-que-e)  
307 [networks/20079-brazilian-network-for-continuous-monitoring-of-the-gnss-systems-](https://www.ibge.gov.br/en/geosciences/geodetic-positioning/geodetic-networks/20079-brazilian-network-for-continuous-monitoring-of-the-gnss-systems-2?=&t=o-que-e)  
308 [2?=&t=o-que-e](https://www.ibge.gov.br/en/geosciences/geodetic-positioning/geodetic-networks/20079-brazilian-network-for-continuous-monitoring-of-the-gnss-systems-2?=&t=o-que-e). The authors acknowledge Gopi Seemala for making available the  
309 GPS-TEC program (<http://seemala.blogspot.com/>).

310

311

312 **References**

- 313 Biqiang, Z., Weixing, W., Libo, L., and Tian, M.: Morphology in the total electron  
314 content under geomagnetic disturbed conditions: results from global ionosphere  
315 maps, *Ann. Geophys.*, 25, 1555-1568, <https://doi.org/10.5194/angeo-25-1555-2007>,  
316 2007.
- 317 Buonsanto, M. J.: Ionospheric storms - A review. *Space Science Reviews*, 88(3-4),  
318 563-601, <https://doi.org/10.1023/A:100510753>, 1999.
- 319 de Siqueira, P. M., de Paula, E. R., Muella, M. T. A. H., Rezende, L. F. C., Abdu, M.  
320 A., and Gonzalez, W. D.: Storm-time total electron content and its response to  
321 penetration electric fields over South America, *Ann. Geophys.*, 29, 1765-1778,  
322 <https://doi.org/10.5194/angeo-29-1765-2011>, 2011.
- 323 de Siqueira Negreti, P. M., de Paula, E. R., and Candido, C. M. N.: Total electron  
324 content responses to HILDCAAs and geomagnetic storms over South America, *Ann.*  
325 *Geophys.*, 35, 1309-1326, <https://doi.org/10.5194/angeo-35-1309-2017>, 2017.
- 326 Habarulema, J. B., McKinnell, L. A., Burešová, D., Zhang, Y., Seemala, G., Ngwira,  
327 C., Chum, J., Opperman, B.: A comparative study of TEC response for the African  
328 equatorial and mid-latitudes during storm conditions *J. Atmos. Sol. Terr. Phys.* 102,  
329 105-114, <https://doi.org/10.1016/j.jastp.2013.05.008>, 2013.
- 330 Hajra, R., Echer, E., Tsurutani, B. T., Gonzalez, W. D.: Solar cycle dependence of  
331 High-Intensity Long-Duration Continuous AE Activity (HILDCAA) events,  
332 relativistic electron predictors?: *J. Geophys. Res.* 118, 5626-5638,  
333 <https://doi.org/10.1002/jgra.50530>, 2013.
- 334 Kim, H.: Study on the particle injections during HILDCAA intervals. *Journal of*  
335 *Astronomy and Space Sciences*, v. 24, <https://doi.org/10.5140/JASS.2007.24.2.119>,  
336 2007.
- 337 Koga, D., Sobral, J. H. A., Gonzalez, W. D., Arruda, D. C. S., Abdu, M. A., Castilho,  
338 V. M., Mascarenhas, M., Gonzalez, A. C., Tsurutani, B. T., Denardini, C. M.,  
339 Zamlutti, C. J.: Electrodynamical coupling process between the magnetosphere and the

340 equatorial ionosphere during a 5-day HILDCAA event. *J. Atmos. Sol. Terr. Phys.* 73,  
341 148-155, <https://doi.org/10.1016/j.jastp.2010.09.002>, 2011.

342 Krishna, S. G., GPS-TEC Analysis Software Version 2.9.5, Sep. 2017, [online]  
343 Available: <http://seemala.blogspot.in/>.

344 Kutiev, I., Watanabe, S., Otsuka, Y., Saito, A.: Total electron content behavior over  
345 Japan during geomagnetic storms. *J. Geophys. Res.*, 110(A1),  
346 <https://doi.org/10.1029/2004JA010586>, 2005.

347 Lu, G., Richmond, A. D., Roble, R. G., Emery, B. A.: Coexistence of ionospheric  
348 positive and negative storm phases under northern winter conditions: A case study. *J.*  
349 *Geophys. Res.*, 106(A11), 24493-24504, <https://doi.org/10.1029/2001JA000003>, 2001

350 Maruyama, T., & Nakamura, M.: Conditions for intense ionospheric storms  
351 expanding to lower midlatitudes. *J. Geophys. Res.*, 112(A5),  
352 <https://doi.org/10.1029/2006JA012226>, 2007.

353 Matsushita, S.: A study of the morphology of ionospheric storms. *J. Geophys. Res.* v.  
354 64, n. 3, p. 305-321, <https://doi.org/10.1029/JZ064i003p00305>, 1959.

355 Mendillo, M.: Storms in the ionosphere: Patterns and processes for total electron  
356 content. *Reviews of Geophysics*, v. 44, n. 4, <https://doi.org/10.1029/2005RG000193>,  
357 2006.

358 Park, C. G.: A morphological study of substorm-associated disturbances in the  
359 ionosphere. *Journal of Geophysical Research*, 79(19), 2821-2827,  
360 <https://doi.org/10.1029/JA079i019p02821>, 1974.

361 Pedatella, N. M., Lei, J., Thayer, J. P., & Forbes, J. M.: Ionosphere response to  
362 recurrent geomagnetic activity: Local time dependency. *Journal of Geophysical*  
363 *Research: Space Physics*, 115(A2), <https://doi.org/10.1029/2009JA014712>, 2010.

364 Prölss, G. W., Najita, K.: Magnetic storm associated changes in the electron content  
365 at low latitudes. *Journal of Atmospheric and Terrestrial Physics*, v. 37, n. 4, p. 635-  
366 643, [https://doi.org/10.1016/0021-9169\(75\)90058-6](https://doi.org/10.1016/0021-9169(75)90058-6), 1975.

367 Silva, R. P., Sobral, J. H. A., Koga, D., and Souza, J. R.: Evidence of prompt  
368 penetration electric fields during HILDCAA events, *Ann. Geophys.*, 35, 1165-1176,  
369 <https://doi.org/10.5194/angeo-35-1165-2017>, 2017.

370 Sobral, J. H. A., Abdu, M. A., Gonzalez, W. D., Clua De Gonzalez, A. L., Tsurutani,  
371 B. T., Da Silva, R. R. L, Barbosa, I. G., Arruda, D. C. S., Denardini, C. M., Zamlutti,  
372 C. J., Guarnieri, F.: Equatorial ionospheric responses to high-intensity long-duration  
373 auroral electrojet activity (HILDCAA), *J. Geophys. Res.* 111, A07S02,  
374 <https://doi.org/10.1029/2005JA011393>, 2006.

375 Sandanger, M. I., Søråas, F., Aarsnes, K., Oksavik, K., Evans, D. S., & Greer, M. S.:  
376 Proton Injections Into the Ring Current Associated With B<sub>z</sub> Variations During  
377 HILDCAA Events. *GEOPHYSICAL MONOGRAPH-AMERICAN GEOPHYSICAL*  
378 *UNION*, 155, 249, <https://doi.org/10.1029/155GM26>, 2005.

379 Søråas, F., Aarsnes, K., Oksavik, K., Sandanger, M. I., Evans, D. S., Greer, M. S.  
380 (2004). Evidence for particle injection as the cause of Dst reduction during  
381 HILDCAA events. *J. Atmos. Sol. Terr. Phys.* 66(2), 177-186,  
382 <https://doi.org/10.1016/j.jastp.2003.05.001>, 2004.

383 Titheridge, J. E., Buonsanto, M. J.: A comparison of northern and southern  
384 hemisphere TEC storm behaviour. *J. Atmos. Sol. Terr. Phys.* 50(9), 763-780,  
385 [https://doi.org/10.1016/0021-9169\(88\)90100-6](https://doi.org/10.1016/0021-9169(88)90100-6), 1988.

386 Tsurutani, B. T., Gonzalez, W.D.: The cause of high intensity long-duration  
387 continuous AE activity (HILDCAA): interplanetary Alfvén wave trains. *Planet Space*  
388 *Sci.* 35, 405-412, [https://doi.org/10.1016/0032-0633\(87\)90097-3](https://doi.org/10.1016/0032-0633(87)90097-3), 1987.

389 Tsurutani, B. T., Gonzalez, W.D., Guarnieri, F., Kamide, Y., Zhou, X., Arballo, J. K.:  
390 Are high-intensity long-duration continuous AE activity (HILDCAA) events  
391 substorm expansion events?, *J. Atmos. Sol. Terr. Phys.* 66,167-176,  
392 <https://doi.org/10.1016/j.jastp.2003.08.015>, 2004.

393 Tsurutani, B. T., Gonzalez, W.D., Gonzalez, A. L. C., Guarnieri, F. L., Gopalswamy,  
394 N., Grande, M., Kamide, Y., Kasahara, Y., Lu, G., Mann, I., McPherron, R., Soraas,  
395 F., Vasyliunas, V.: Corotating solar wind streams and recurrent geomagnetic activity:



396 A review. J. Geophys. Res. 111, A07S01, <https://doi.org/10.1029/2005JA011273>,  
397 2006.

398 Verkhoglyadova, O. P., Tsurutani, B. T., Mannucci, A. J., Mlynczak, M. G., Hunt, L.  
399 A., and Runge, T.: Variability of ionospheric TEC during solar and geomagnetic  
400 minima (2008 and 2009): external high speed stream drivers, Ann. Geophys., 31,  
401 263-276, <https://doi.org/10.5194/angeo-31-263-2013>, 2013.

402 Yeeram, T.; Paratrasri, A.: Recurrent geomagnetic storms and equinoctial ionospheric  
403 F-region in the low magnetic latitude: a case study. In: Journal of Physics:  
404 Conference Series. IOP Publishing, 012024, [https://doi.org/10.1088/1742-](https://doi.org/10.1088/1742-6596/1144/1/012024)  
405 [6596/1144/1/012024](https://doi.org/10.1088/1742-6596/1144/1/012024), 2018.

406 Yeeram, T.: The solar wind-magnetosphere coupling and daytime disturbance electric  
407 fields in equatorial ionosphere during consecutive recurrent geomagnetic storms. J.  
408 Atmos. Sol. Terr. Phys, 187, 40-52, <https://doi.org/10.1016/j.jastp.2019.03.004>, 2019.

409

410

411 **Figure captions**

412 **FIGURE 1** – Map showing the locations of the GNSS stations used in the present  
413 study. Both stations are localized in the Brazilian region and are marked by a red triangle,  
414 where SL and CP are, respectively, São Luís and Cachoeira Paulista.

415 **FIGURE 2** – dTEC hourly values to all HILDCAA intervals to São Luís (equatorial  
416 station).

417 **FIGURE 3** – dTEC hourly values to all HILDCAA intervals to Cachoeira Paulista  
418 (low latitude station).

419 **FIGURE 4** – Seasonal dTEC response to HILDCAA intervals. The blue and coral  
420 lines refer to São Luís and Cachoeira Paulista, respectively.

421 **FIGURE 5** – Solar wind velocities analysis during HILDCAA intervals. The blue  
422 and coral colors refer to São Luís and Cachoeira Paulista stations, respectively, while  
423 the bubble diameter is related to velocity (km/s).

424

425

426 **Table captions**

427 **TABLE 1** – The date range for HILDCAA intervals identified during 2015 – 2016

428 years

429 **TABLE 2** – Seasonal classification of HILDCAA intervals (according to the seasons

430 in the Southern hemisphere).

431

432 **FIGURE 1** –

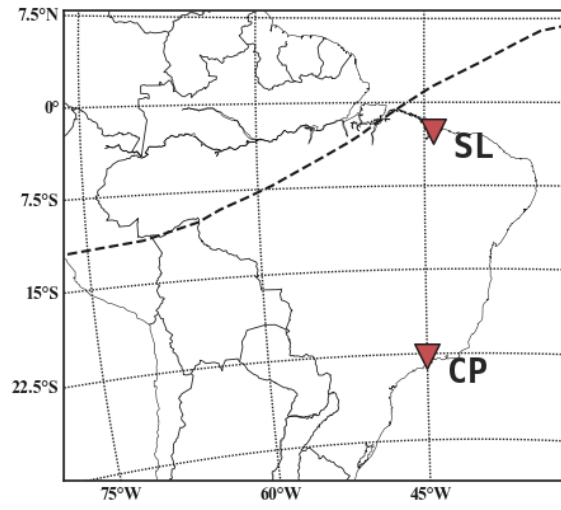

433

434

435

436 **FIGURE 2 –**

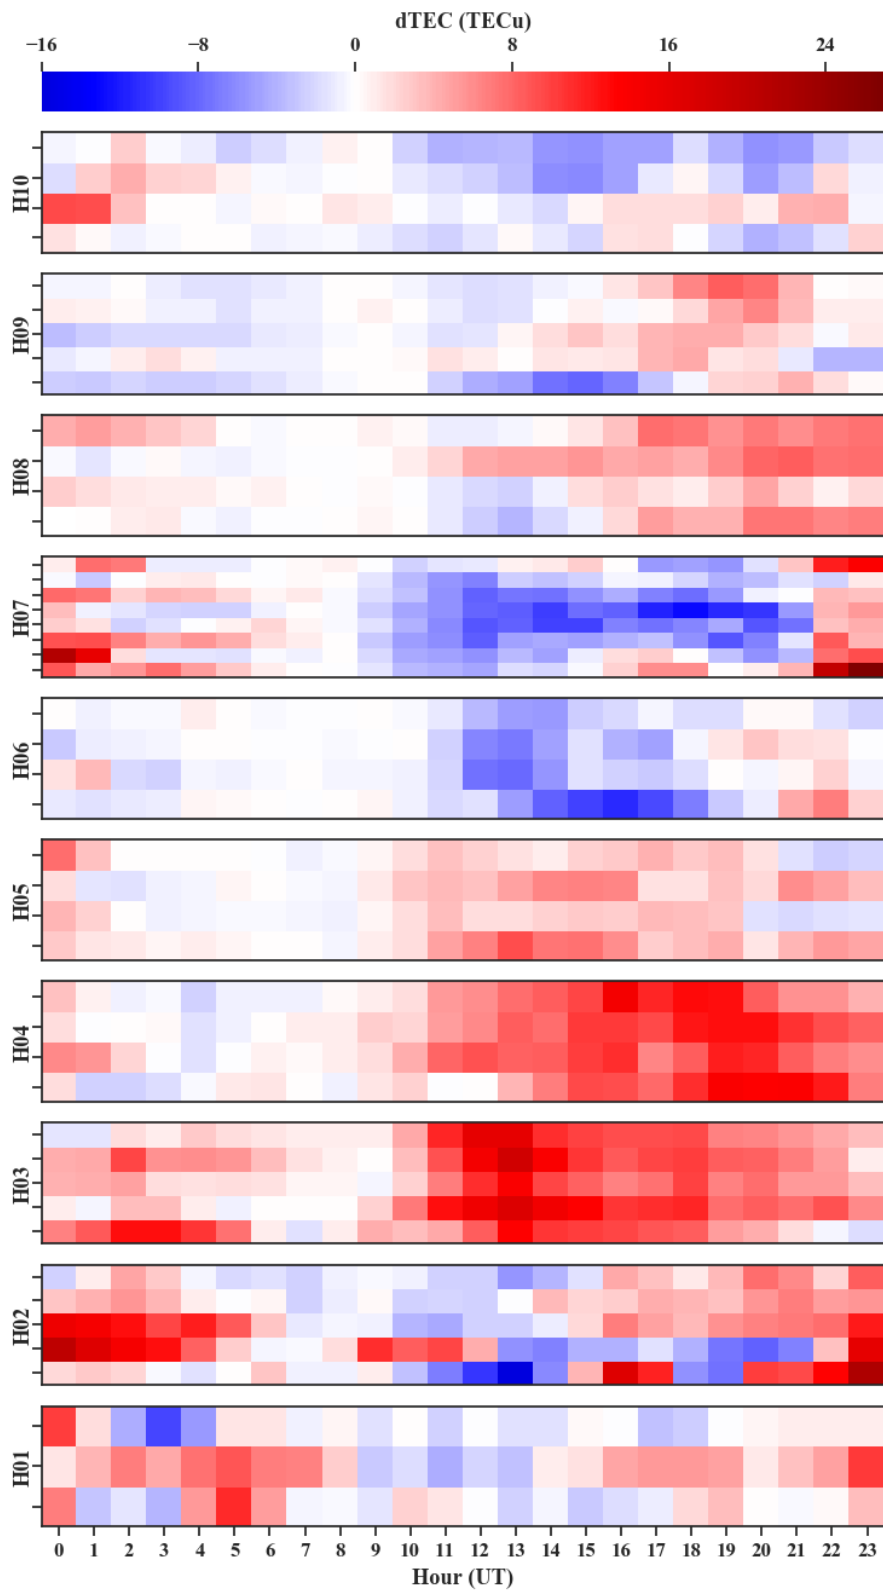

437

438

439

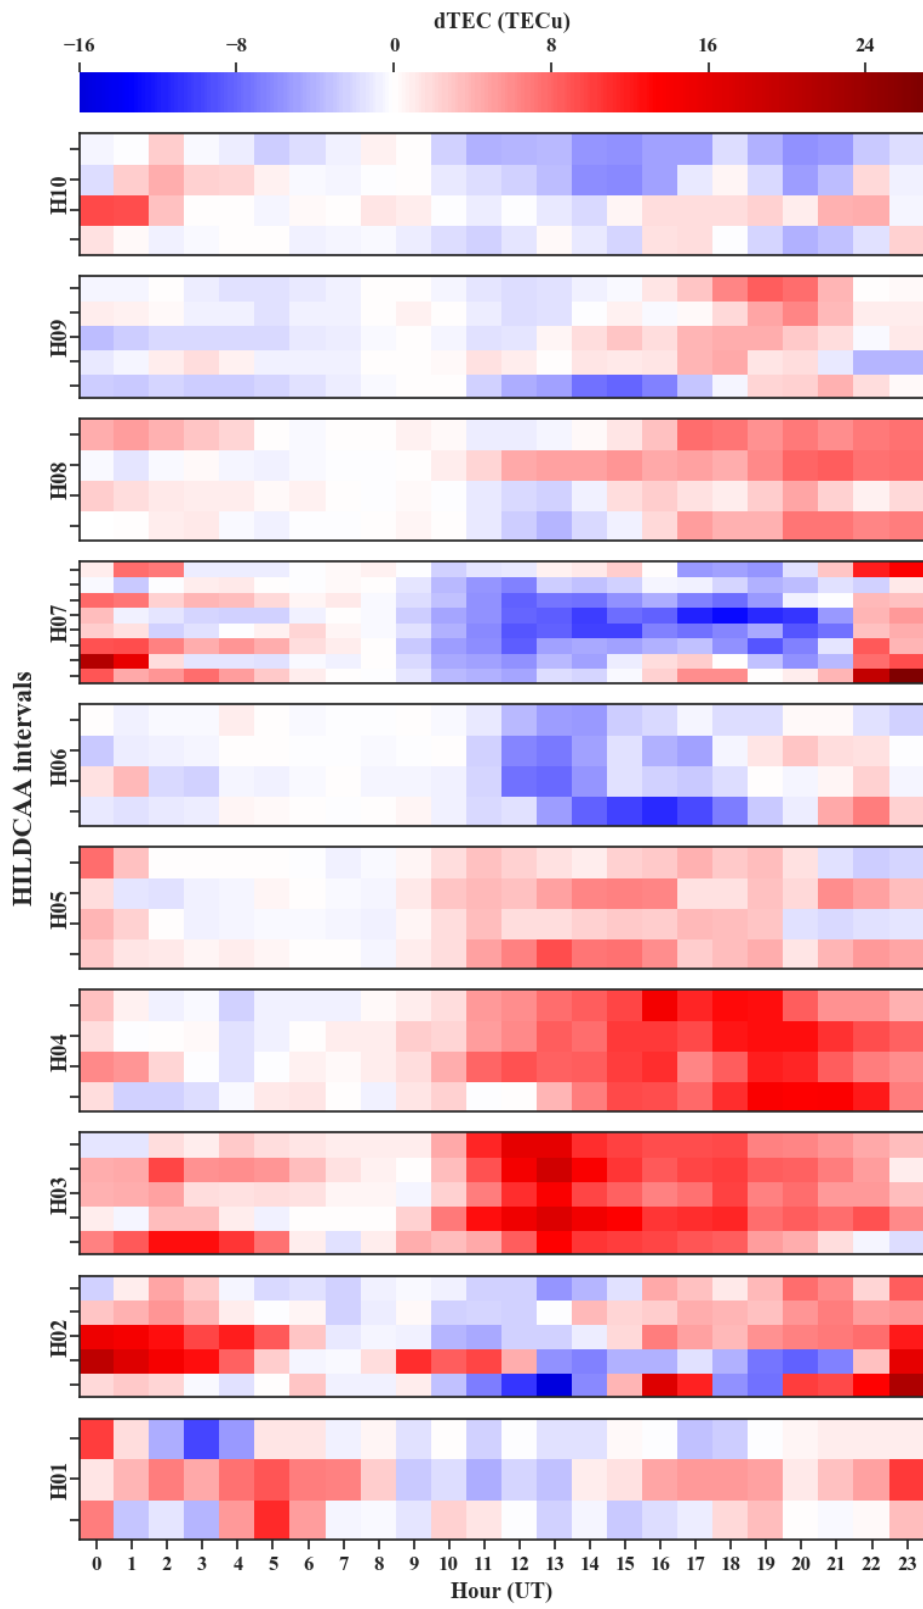

441

442

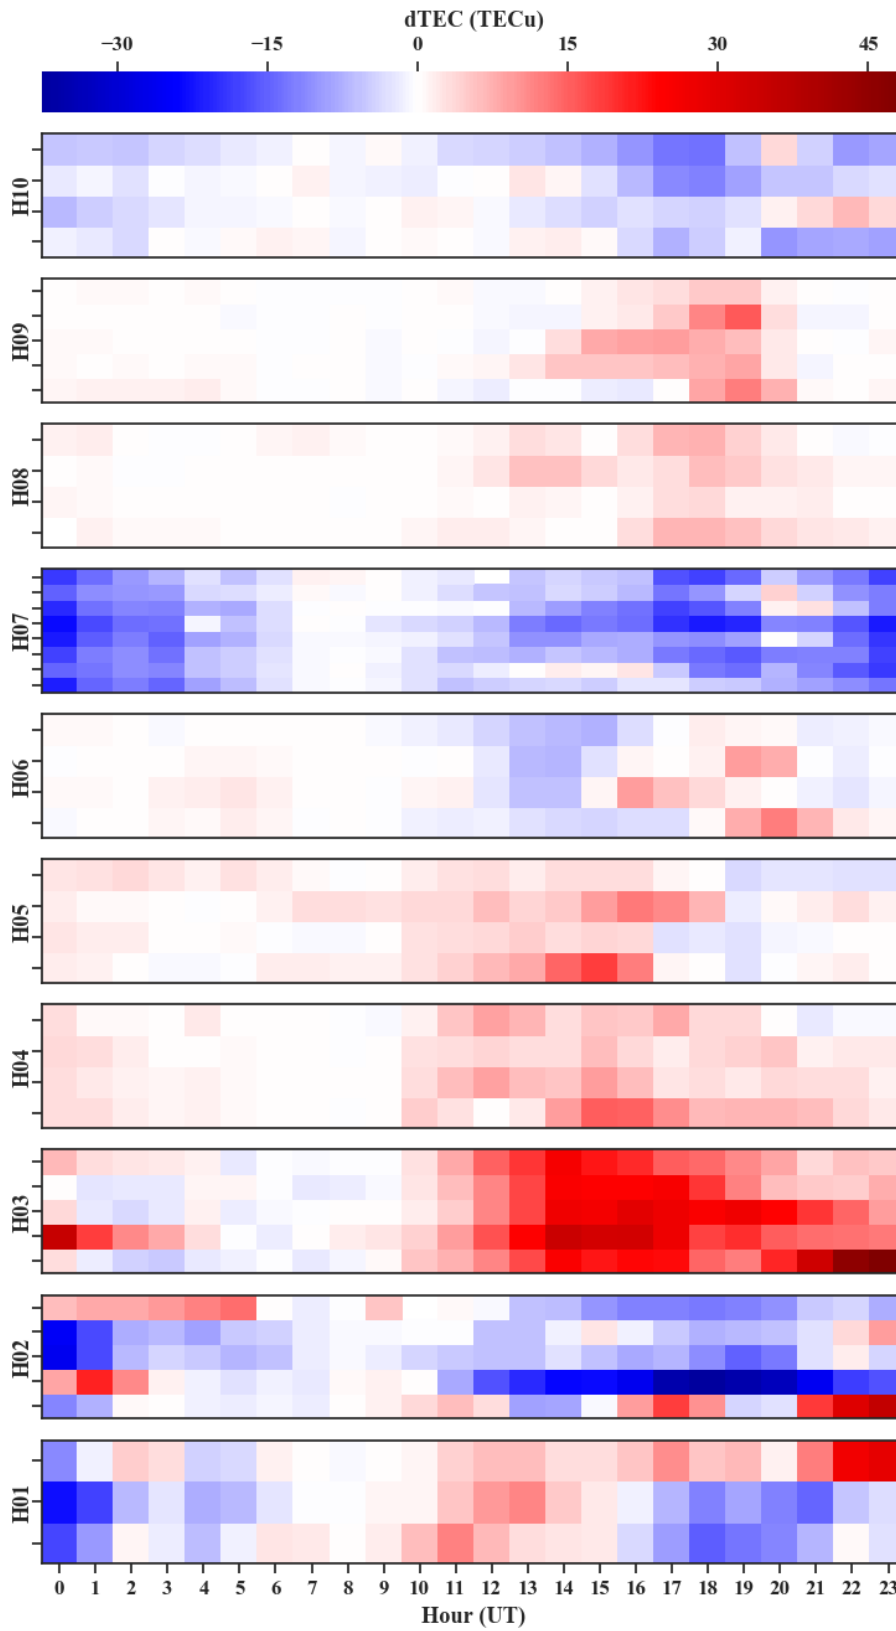

444

445

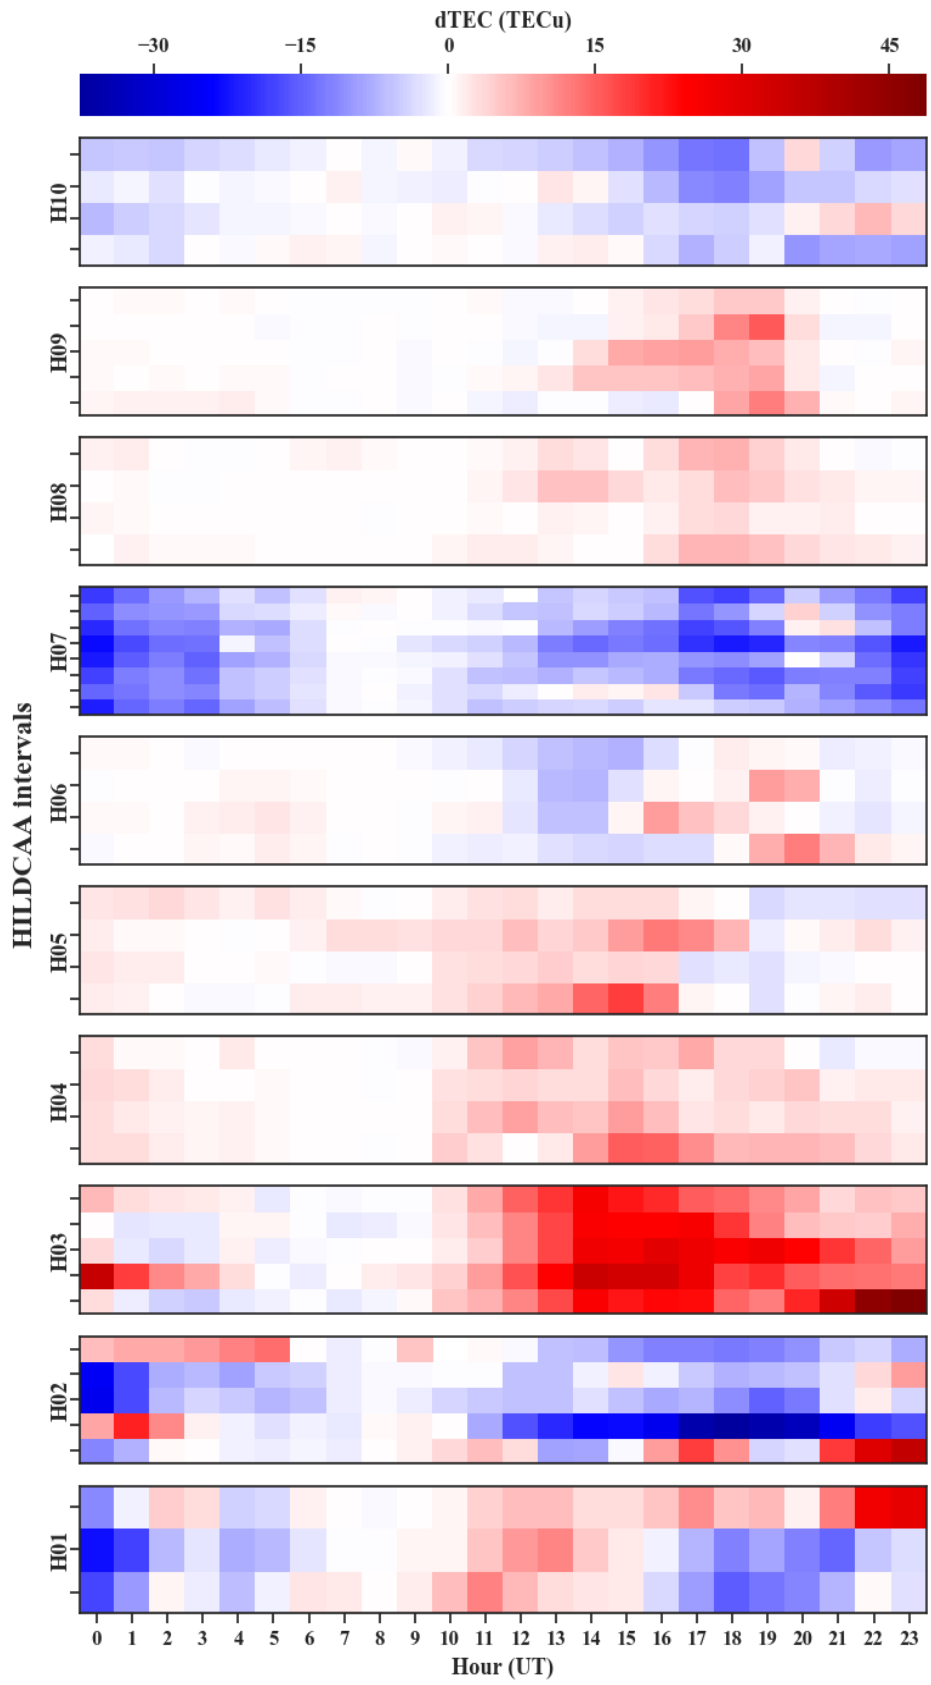



449 **FIGURE 4** —

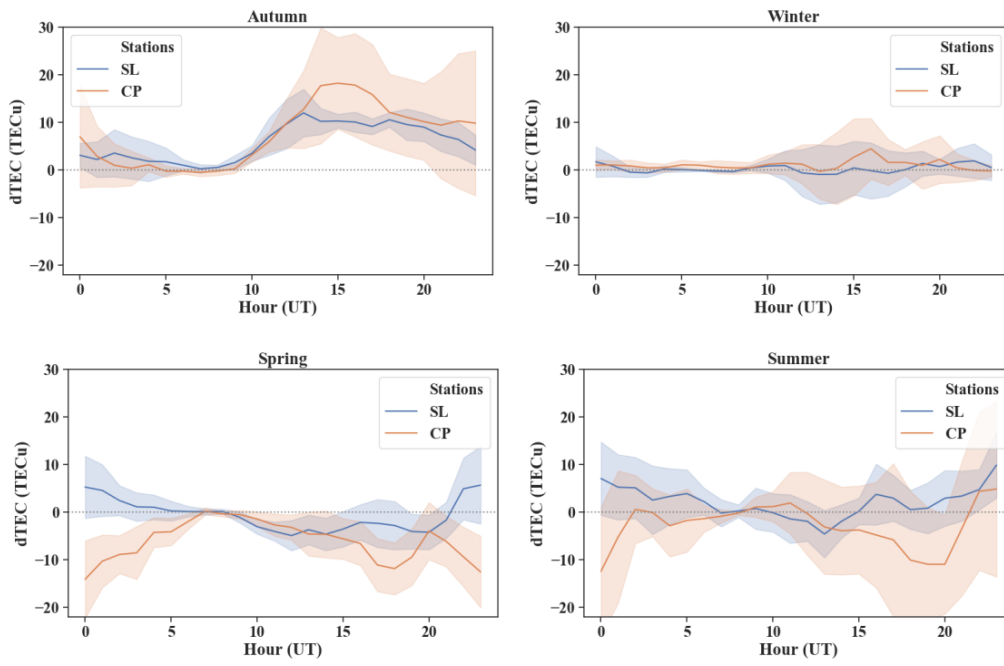

450

451

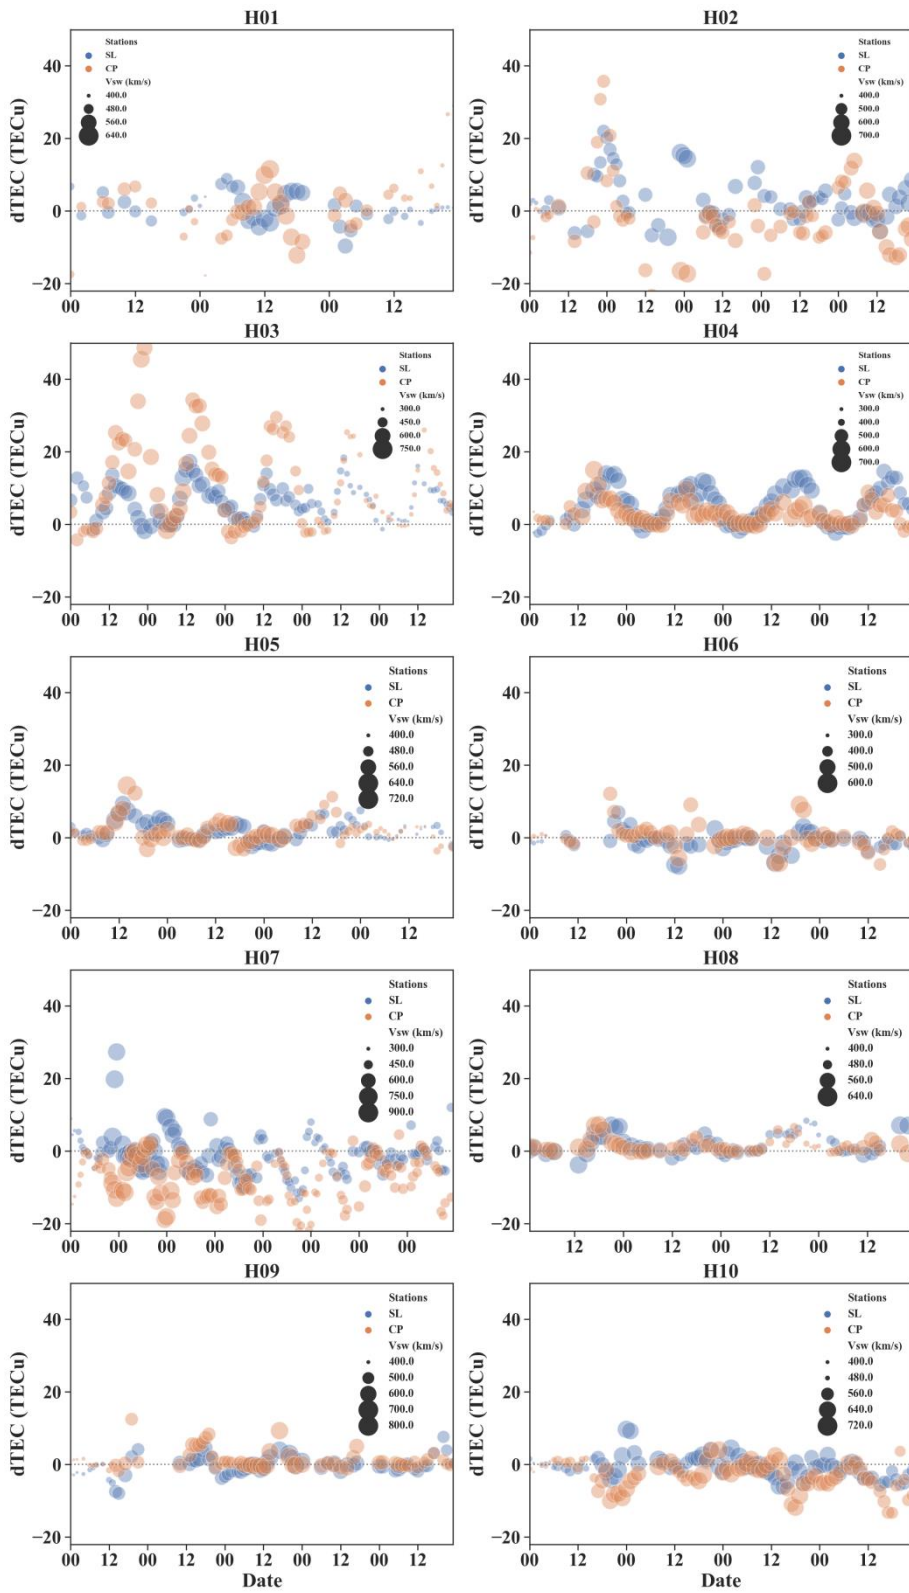

453

454

455 **TABLE 1 –**

| ID  | Date range      |
|-----|-----------------|
| H01 | 2015/03/01 – 03 |
| H02 | 2015/03/17 – 21 |
| H03 | 2015/04/16 – 20 |
| H04 | 2015/06/08 – 11 |
| H05 | 2015/07/11 – 14 |
| H06 | 2015/08/15 – 18 |
| H07 | 2015/10/07 – 14 |
| H08 | 2016/07/09 – 12 |
| H09 | 2016/08/03 – 07 |
| H10 | 2016/12/08 – 11 |

456

457

458

459 **TABLE 2** –

| Season | HILDCAA Intervals |
|--------|-------------------|
| Autumn | H03 and H04       |
| Winter | H05 and H06       |
| Spring | H07 and H10       |
| Summer | H01 and H02       |

460
